# Supplementary material
Source: Research Square preprint supplement (doi:10.21203/rs.3.rs-9231981/v1)
Supplement: Supplementary file 1 [file 2a2cb8b3345d8cbef7829c8b.pdf]

**Supplemental Figure 1: F1 Score of the multi-step LLM workflow according to the human-in-the-loop verification of LLM suggestions**

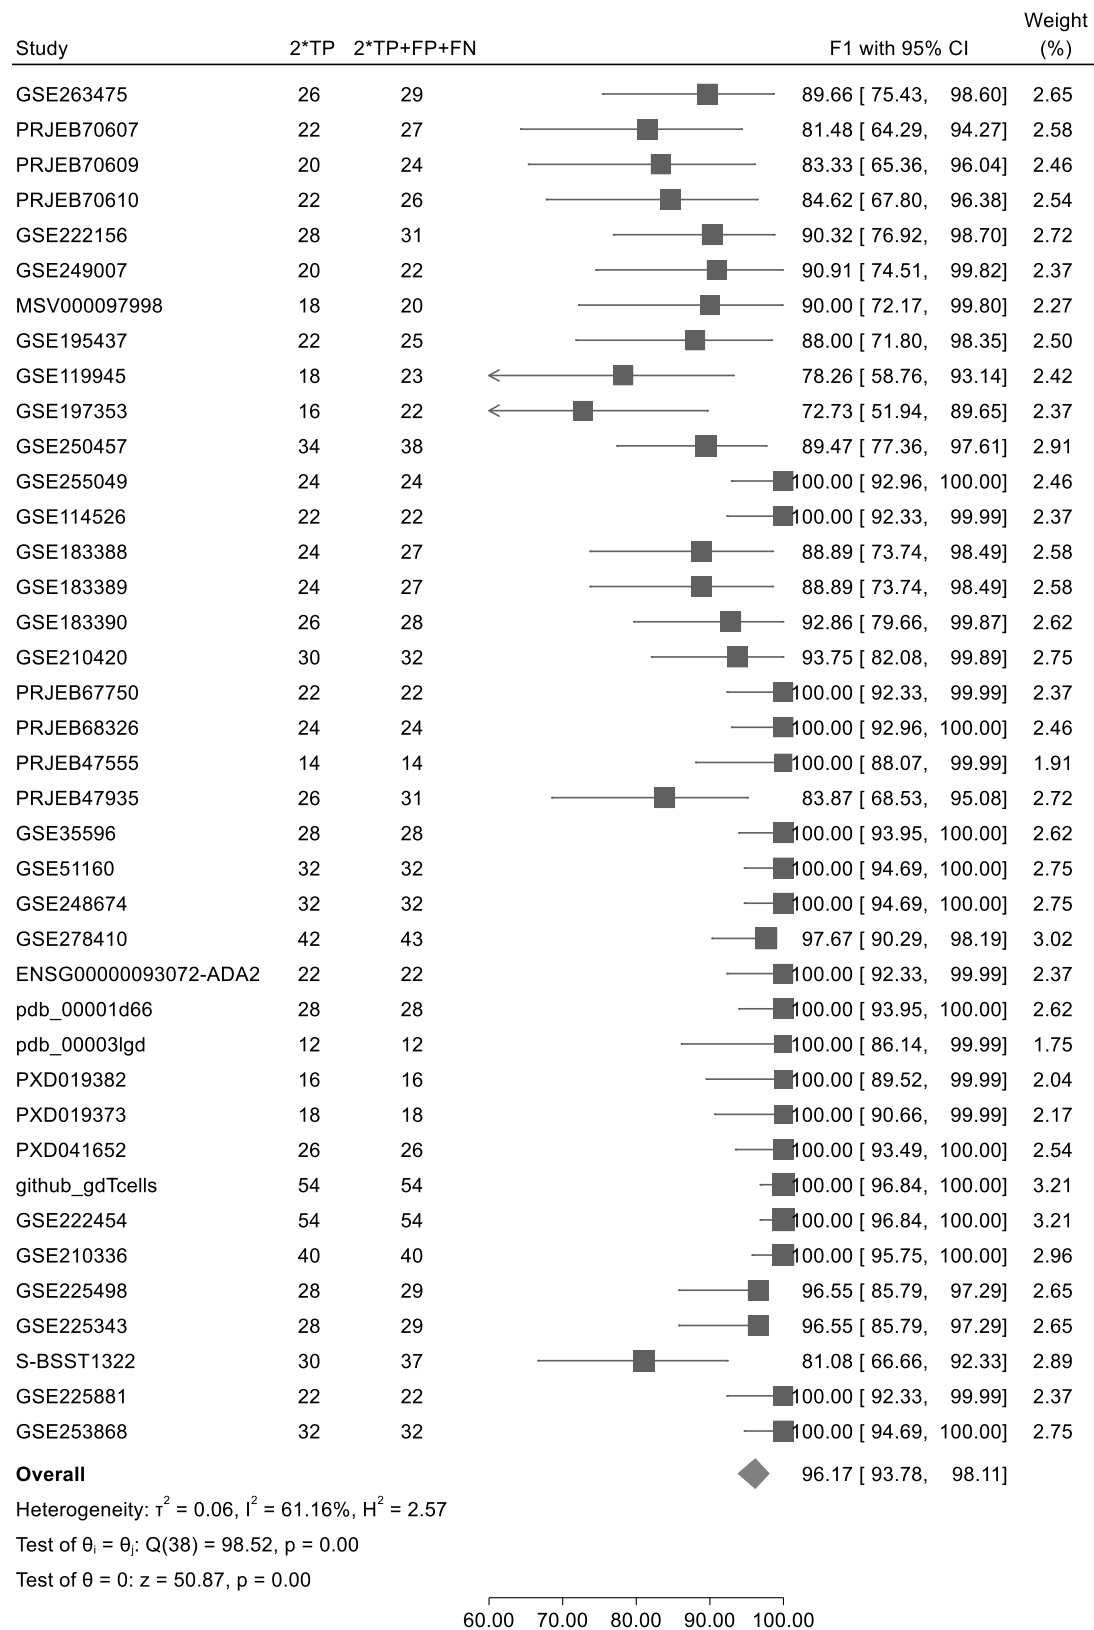

Random-effects REML model
